# Supplementary material for: A highly active Ni(II)-triadamantylphosphine catalyst for ultrahigh-molecular-weight polyethylene synthesis
Source: PubMed Central journal article supplement (PMC6347634; doi:10.1038/s41467-019-08309-8), 2019-01-25
Supplement: 41467_2019_8309_MOESM2_ESM.pdf [file 41467_2019_8309_MOESM2_ESM.pdf]

Editorial Note: This manuscript has been previously reviewed at another journal that is not operating a transparent peer review scheme. This document only contains reviewer comments and rebuttal letters for versions considered at Nature Communications.

#### REVIEWERS' COMMENTS:

Reviewer #1 (Remarks to the Author):

The authors have addressed my previous concerns. I think this manuscript represent an important advance in this field. I recommend the publication of this manuscript in the current form.

Reviewer #2 (Remarks to the Author):

In this work, the authors describes a bulky nickel complex ( $[\text{Ad}3\text{PNiBr}3]-[\text{Ad}3\text{PH}]^+$ ) and its application on the production of ultrahigh-molecular-weight ( $M_n$  up to  $1.68 \times 10^6$  g/mol) polyethylene with high activities (3.7 million turnovers/h). This paper is a revised version of a manuscript that I recently reviewed for Nature Catalysis. All of my concerns have been addressed, but the added results was not very satisfying. Catalytic activity of this bulky nickel catalysts and molecular weight of polyethylene both dramatically decreased (Table 1, entry 14-16). Additionally, the polymerization in presence of polar additives and the copolymerization of ethylene with acrylates was not successful. Monodentate phosphine nickel complexes have been reported for ethylene polymerization (Ref 17 and 18), and this work made a big progress by introducing a bulky phosphine group. This study is thorough and there are no technical problems but does not offer a sufficiently significant advance to warrant publication in Nature Communications.
